# Supplementary material
Source: PubMed Central journal article supplement (PMC9992448)
Supplement: NIHMS1841167-supplement-SM.pdf [file NIHMS1841167-supplement-SM.pdf]

**Membrane Tethering of SepF, a Membrane Anchor for the *Mycobacterium tuberculosis* Z-ring**

Souvik Dey<sup>1</sup> and Huan-Xiang Zhou<sup>1,2\*</sup>

<sup>1</sup>Department of Chemistry and <sup>2</sup>Department of Physics, University of Illinois at Chicago, IL 60607, USA

\*Correspondence: hzhou43@uic.edu

*Supplementary Material*

|     |            |     |                                                              |     |
|-----|------------|-----|--------------------------------------------------------------|-----|
| (a) | <i>Mtb</i> | 1   | MSTLHKVKAYFG                                                 | 12  |
|     | <i>Msm</i> | 1   | MSTLHKVKAYFG                                                 | 12  |
|     | <i>Cgl</i> | 1   | MSMLKKTKEFFG                                                 | 12  |
|     | <i>Bsu</i> | 1   | MSMKNKLKNFFS                                                 | 12  |
|     |            |     | ** : * * : *                                                 |     |
| (b) | <i>Mtb</i> | 128 | SKITTLRPKDYSEARTIGERFRDGPVIMDLVSMDNADAKRLVDF AAGLA           | 177 |
|     | <i>Msm</i> | 124 | AKITTLRPKDYSEARTIGERFRDGTVPVIMDLVSMDNADAKRLVDF AAGLA         | 173 |
|     | <i>Cgl</i> | 67  | STIVVELHSFEDAQVIGGAFRDGDAVVFDM SLLSREEARRIVDF AAGLC          | 116 |
|     | <i>Bsu</i> | 62  | SKVVLSEPRVYAEAEQEIADHLKNRRRAVVVNLQRIQH DQAKRIVDF LSGTV       | 111 |
|     |            |     | :.:. . : : : * : * . : : : * : : : : . . : * : * : * * * : * |     |
|     | <i>Mtb</i> | 178 | FALRGSFDK VATK VFL LSPADVDV SPEERRRIAETG F YAYQ              | 218 |
|     | <i>Msm</i> | 174 | FALRGSFDK VATK VFL LSPADVDV TAEERRRIA EAG F YSYR             | 214 |
|     | <i>Cgl</i> | 117 | FALRGKM QKIDS VTF AVVPELSNISTSE LERAARIR                     | 152 |
|     | <i>Bsu</i> | 112 | YAIGGDIQRIGSDIFLCTPDNVDVSGTISELISEDEHQRW                     | 151 |
|     |            |     | * : * . : : : : : * * : : : . .                              |     |
| (c) | <i>Mtb</i> | 27  | R-APSRGYAR-PR                                                | 37  |
|     | <i>Msm</i> | 28  | RGARAGGYSRRPR                                                | 41  |
|     |            |     | * * : * : * * *                                              |     |
|     | <i>Mtb</i> | 95  | RP---RFGSWLRNSTR                                             | 107 |
|     | <i>Msm</i> | 89  | RPAPARLGAM-RGSTR                                             | 103 |
|     |            |     | ** * : * : * . * * *                                         |     |

Figure S1. Sequence alignment of SepF homologs from *Mtb*, *Msm*, *Cgl*, and *Bsu*. (a) The N-terminal amphipathic helix. (b) The FtsZ-binding core domain. Alignment was done using CLUSTAL Omega (version 1.2.4) [1]. Identical residues are indicated by “\*”; similar residues are indicated by “:” or “.”. The intervening residues between those shown in (a) and (b) make up the linkers. (c) Manual alignment of two Arg-rich stretches in the linkers of *Mtb* and *Msm* SepFs.

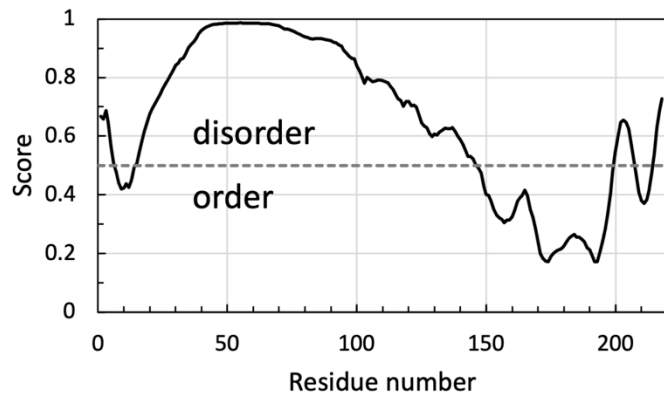

Figure S2. Disorder prediction for *Mtb* SepF using PONDR-VLS2 [2].

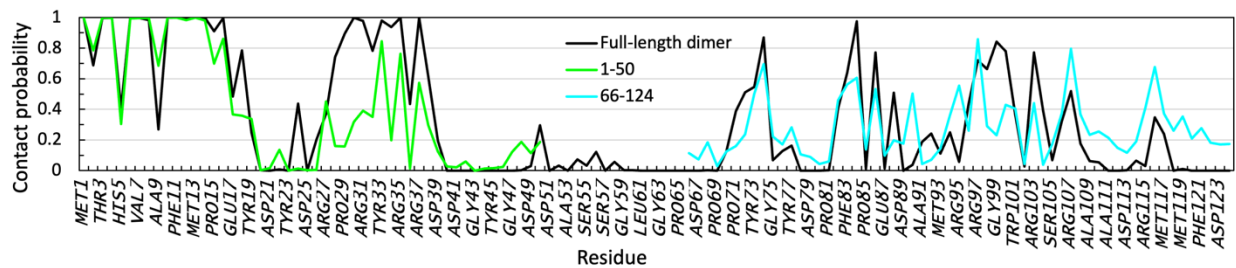

Figure S3. Membrane contact probabilities of residues in full-length *Mtb* SepF dimer, compared with the counterparts in the SepF1-50 and SepF66-124 simulations. The dimer results are the average of the two chains, calculated on snapshots saved after discarding the first 20 ns. The results for the two fragments are the same as those displayed in Figure 2d, g.

## Supplementary References

- [1] Sievers F, Wilm A, Dineen D, Gibson TJ, Karplus K, Li W, et al. Fast, scalable generation of high-quality protein multiple sequence alignments using Clustal Omega. *Mol Syst Biol.* 2011;7:539.
- [2] Xue B, Dunbrack RL, Williams RW, Dunker AK, Uversky VN. PONDR-FIT: A meta-predictor of intrinsically disordered amino acids. *Biochim Biophys Acta - Proteins Proteom.* 2010;1804:996-1010.

Video S1. A 400 ns clip from one of the replicate simulations of SepF1-50 tethered to a 7:3 POPG/POPC membrane. Snapshots were saved every 1 ns and played at 24 per second. The N-terminal amphipathic helix is shown in yellow; the 27-37 stretch is highlighted in green. POPG and POPC headgroups are shown as pink and gray surfaces, respectively; acyl chains are not displayed. Arg and Lys sidechains are shown as blue sticks when any of their heavy atoms are within 3.5 Å of any lipid heavy atoms; POPG (or POPC) headgroups are shown as pink (or gray) sticks when any of their heavy atoms are within 3.5 Å of any Arg or Lys heavy atom.

Video S2. Corresponding video for SepF66-124 tethered to a 7:3 POPG/POPC membrane. The 95-107 stretch is highlighted in green.
